# Supplementary material for: Rapid access to sulfate-encapsulated symmetrical and asymmetrical capsules based on silver–pyrazole complex cations
Source: Royal Society of Chemistry journal article supplement (doi:10.1039/c9nj02105a), 2019-01-01
Supplement: c9nj02105a1.pdf [file c9nj02105a1.pdf]

## Supporting Information for New Journal of Chemistry

### Rapid access to sulfate-encapsulated symmetrical and asymmetrical capsules based on silver-pyrazole complex cations

*Chang-Chuan Chou,\* Yu-Ting Lai, Chia-Chi Yang and Ting-Sen Kuo*

#### Contents

1. General information (Table S1)
2. Synthesis of complex  $[\text{Ag}_2(\text{L}^1)_4(\text{SO}_4)]$  (**1**)
3. Synthesis of complex  $[\text{Ag}_2(\text{L}^2)_5(\text{SO}_4)(\text{H}_2\text{O})]$  (**2**)
4. Synthesis of  $[\text{Ag}_2(\text{L}^3)_6(\text{SO}_4)]$  (**3**)
5. Synthesis of complex  $[\text{Cu}_2(\text{L}^3)_6(\text{SO}_4)]$  (**4**)
6. The 1-D polymeric array of complex **1** (Figure S2)
7. The hydrogen bonds and dative bonds around disordered sulfate for complex **2** (Figure S3)
8. IR spectrum of complex **1** (Figure S4)
9. IR spectrum of complex **2** (Figure S5)
10. IR spectrum of complex **3** (Figure S6)
11. IR spectrum of complex **4** (Figure S7)
12.  $^1\text{H}$  &  $^{13}\text{C}$  NMR spectra of complex **1** (Figure S8)
13.  $^1\text{H}$  &  $^{13}\text{C}$  NMR spectra of complex **2** (Figure S9)
14.  $^1\text{H}$  &  $^{13}\text{C}$  NMR spectra of complex **3** (Figure S10)
15.  $^1\text{H}$  &  $^{13}\text{C}$  NMR spectra of complex **4** (Figure S11)
16. ESI-MS of complex **1** (Figure S12)
17. ESI-MS of complex **2** (Figure S13)
18. ESI-MS of complex **3** (Figure S14)
19. ESI-MS of complex **4** (Figure S15)
20. PXRD of complex **2** (Figure S16)
21. PXRD of complex **3** (Figure S17)
22. PXRD of complex **4** (Figure S18)
23. TGA of complex **1** (Figure S19)
24. TGA of complex **2** (Figure S20)
25. TGA of complex **3** (Figure S21)
26. TGA of complex **4** (Figure S22)

## 1. General information

The preparation of complexes **1**~**3** were carried out under air atmosphere whereas complex **4** was prepared under a nitrogen atmosphere using standard Schlenk technique. Dichloromethane were distilled from CaH<sub>2</sub> before use. Diethyl ether was dried by distillation from sodium benzophenone prior to use. Other reagents were obtained from commercial suppliers and used as received without further purification. The ligands L<sup>1</sup>~L<sup>3</sup> were prepared according to literature procedures. Infrared spectra were recorded on a Bruker Alpha-T FTIR spectrometer as Nujol mulls. <sup>1</sup>H NMR and <sup>13</sup>C NMR spectra were obtained at room temperature using Bruker Avance 600 MHz spectrometers. Mass spectra were acquired on a Finnigan TSQ 700 spectrometer. Elemental analyses were performed on a HERAEUS CHN-O-S-Rapid elemental analyzer by Instruments Center, National Chung Hsin University. Powder X-ray diffraction (PXRD) data were recorded on a Bruker D8 ADVANCE X-ray powder diffractometer. TGA data were recorded by Instruments Center, National Tsing Hua University.

### X-ray Crystallographic Analysis of 1-4.

Crystal data collection and processing parameters are given in Table S1. Diffraction data were carried out on a Bruker APEX2 CCD diffractometer with graphite monochromated Mo-K $\alpha$  radiation ( $\lambda = 0.7107 \text{ \AA}$ ). The structures **1-4** were solved by direct methods and refined by full-matrix least-squares procedures using the SHELXL-97 program. All of the non-hydrogen atoms were refined with anisotropic temperature factors. All hydrogen atoms were located geometrically and refined in the riding mode. For complex **2**, the crystal structure is disordered at the O2, O3, O4, C37, C38, C53, C54, and C55 positions: a refined occupancy ratios of 0.70 : 0.30 for O2-O4 atoms, 0.50 : 0.50 for C37 and C38 atoms, and 0.54 : 0.46 for C53-C55. For complex **4**, the SQUEEZE option in Platon was used without the contribution of solvent molecules, leading to the presence of solvent accessible void, to refine the structure. A Platon void calculation for the solvent free form gave a total potential solvent volume of 269  $\text{\AA}^3$  (3.3%) which is roughly in agreement with half solvated dichloromethane (2.7%). Additional crystallographic data as CIF files are available as Supporting Information.

**Table S1** X-ray crystallographic data for complexes **1** – **4**.

|                                                     | <b>1</b>                                                                                       | <b>2</b>                                                                         | <b>3</b>                                                                        | <b>4</b>                                                                        |
|-----------------------------------------------------|------------------------------------------------------------------------------------------------|----------------------------------------------------------------------------------|---------------------------------------------------------------------------------|---------------------------------------------------------------------------------|
| Empirical Formula                                   | C <sub>96</sub> H <sub>112</sub> N <sub>16</sub> Ag <sub>4</sub> S <sub>2</sub> O <sub>8</sub> | C <sub>55</sub> H <sub>102</sub> N <sub>10</sub> Ag <sub>2</sub> SO <sub>5</sub> | C <sub>90</sub> H <sub>72</sub> N <sub>12</sub> Ag <sub>2</sub> SO <sub>4</sub> | C <sub>90</sub> H <sub>72</sub> N <sub>12</sub> Cu <sub>2</sub> SO <sub>4</sub> |
| Formula weight                                      | 2113.62                                                                                        | 1231.27                                                                          | 1633.40                                                                         | 1544.74                                                                         |
| <i>T</i> (K)                                        | 200(2)                                                                                         | 200(2)                                                                           | 200(2)                                                                          | 200(2)                                                                          |
| $\lambda$ (Å)                                       | 0.71073                                                                                        | 0.71073                                                                          | 0.71073                                                                         | 0.71073                                                                         |
| Crystal system                                      | Triclinic                                                                                      | Triclinic                                                                        | Monoclinic                                                                      | Monoclinic                                                                      |
| Space group                                         | <i>P</i> $\bar{1}$                                                                             | <i>P</i> $\bar{1}$                                                               | <i>P</i> 2 <sub>1</sub> / <i>n</i>                                              | <i>C</i> 2/ <i>c</i>                                                            |
| <i>a</i> (Å)                                        | 9.384(3)                                                                                       | 11.6173(4)                                                                       | 12.1323(5)                                                                      | 21.6261(11)                                                                     |
| <i>b</i> (Å)                                        | 15.712(6)                                                                                      | 14.1867(5)                                                                       | 17.6149(6)                                                                      | 13.7166(6)                                                                      |
| <i>c</i> (Å)                                        | 17.847(7)                                                                                      | 20.5791(5)                                                                       | 35.9629(14)                                                                     | 29.3214(11)                                                                     |
| $\alpha$ (°)                                        | 65.553(12)                                                                                     | 95.8130(10)                                                                      | 90                                                                              | 90                                                                              |
| $\beta$ (°)                                         | 86.379(10)                                                                                     | 105.9260(10)                                                                     | 91.7810(10)                                                                     | 107.5170(10)                                                                    |
| $\gamma$ (°)                                        | 80.780(11)                                                                                     | 94.0010(10)                                                                      | 90                                                                              | 90                                                                              |
| <i>V</i> (Å <sup>3</sup> )                          | 2364.4(15)                                                                                     | 3227.79(18)                                                                      | 7681.9(5)                                                                       | 8294.5(6)                                                                       |
| <i>Z</i>                                            | 1                                                                                              | 2                                                                                | 4                                                                               | 4                                                                               |
| <i>D</i> <sub>calc</sub> (Mg m <sup>-3</sup> )      | 1.484                                                                                          | 1.267                                                                            | 1.412                                                                           | 1.237                                                                           |
| $\mu$ (mm <sup>-1</sup> )                           | 0.924                                                                                          | 0.688                                                                            | 0.599                                                                           | 0.595                                                                           |
| <i>F</i> (000)                                      | 1084                                                                                           | 1304                                                                             | 3352                                                                            | 3208                                                                            |
| $\theta$ range for data collection                  | 2.20–25.19°                                                                                    | 2.35–25.01°                                                                      | 2.10–25.36°                                                                     | 2.48–25.06°                                                                     |
| Reflections collected                               | 50510                                                                                          | 109214                                                                           | 135114                                                                          | 46462                                                                           |
| Independent reflections ( <i>R</i> <sub>int</sub> ) | 8462 (0.0760)                                                                                  | 11355 (0.0589)                                                                   | 14033 (0.0290)                                                                  | 7316 (0.0391)                                                                   |
| Data / restraints / parameters                      | 8462 / 0 / 576                                                                                 | 11355 / 2 / 644                                                                  | 14033 / 0 / 982                                                                 | 7316 / 0 / 492                                                                  |
| Goodness-of-fit on <i>F</i> <sup>2</sup>            | 1.057                                                                                          | 1.000                                                                            | 1.036                                                                           | 1.062                                                                           |
| <i>R</i> <sub>1</sub> , <i>wR</i> <sub>2</sub>      | 0.0398, 0.0821                                                                                 | 0.0421, 0.1110                                                                   | 0.0261, 0.0647                                                                  | 0.0359, 0.1031                                                                  |
| CCDC No.                                            | 1906953                                                                                        | 1906960                                                                          | 1906964                                                                         | 1906972                                                                         |

## 2 Synthesis of complex [Ag<sub>2</sub>(L<sup>1</sup>)<sub>4</sub>(SO<sub>4</sub>)] (1)

Method 1. Ag<sub>2</sub>SO<sub>4</sub> (0.146 g, 0.468 mmol) was dissolved in R.O. water (50 mL). To this solution was added dropwisely a solution of L<sup>1</sup> (0.355 g, 1.91 mmol) in acetone (30 mL). After stirring the reaction mixture for another 30 minutes, a white precipitate was formed. The solids filtered off and washed with R.O. water and ether to yield white powder product 0.435 g (88%). Method 2. Changing the acetone solvent with dichloromethane (50 mL) to form a two-phase system. After vigorously stirring the reaction mixture for 1 hour, the organic layer was separated and concentrated under reduced pressure. Layerd with ether to give complex **1** (90% yield). <sup>1</sup>H NMR (600 MHz, CD<sub>2</sub>C1<sub>2</sub>): δ 13.57 (s, 1H), 7.26-7.08 (m, 5H), 3.71 (s, 2H), 2.08 (s, 1H) ppm; <sup>13</sup>C NMR (150 MHz, CD<sub>2</sub>C1<sub>2</sub>): 141.1, 128.9, 128.6, 126.5, 115.0, 29.5, 12.1 ppm; IR (Nujol): ν<sub>N-H</sub> 3191, 3142, 3083, 3056 cm<sup>-1</sup>, ν<sub>C=N</sub> 1587 cm<sup>-1</sup>, ν<sub>SO<sub>4</sub><sup>-</sup></sub> 1178, 1123, 1091, 1045 cm<sup>-1</sup>; Positive ESI-MS: [L+H]<sup>+</sup> 187.65 (11%), [AgL<sub>2</sub>]<sup>+</sup> 481.88 (100%), [Ag<sub>2</sub>L<sub>3</sub>]<sup>+</sup> 773.28 (10%), [Ag<sub>3</sub>L<sub>6</sub>(SO<sub>4</sub>)]<sup>+</sup> 1536.20 (47%). Single crystals were grown from CH<sub>2</sub>Cl<sub>2</sub>/Et<sub>2</sub>O. Anal. Calcd for C<sub>9</sub>H<sub>11</sub>N<sub>16</sub>Ag<sub>4</sub>S<sub>2</sub>O<sub>8</sub>: C, 54.55; H, 5.34; N, 10.60. Found: C, 54.88; H, 5.38; N, 10.79 %.

## 3 Synthesis of complex [Ag<sub>2</sub>(L<sup>2</sup>)<sub>5</sub>(SO<sub>4</sub>)(H<sub>2</sub>O)] (2)

Method 1. Ag<sub>2</sub>SO<sub>4</sub> (0.147 g, 0.471 mmol) was dissolved in R.O. water (50 mL). To this solution was added dropwisely a solution of L<sup>2</sup> (0.432 g, 2.40 mmol) in acetone (30 mL). After stirring the reaction mixture for another 30 minutes, a white precipitate was formed. The obtained solid was washed by R.O. water and then ether to afford white solid product 0.541 g (93%), which is identified by elemental analysis as complex **2**. Single crystals were obtained by the slow evaporation of acetonitrile (95%) solution of **2** to dryness in the air. Method 2. Changing the acetone solvent with dichloromethane (50 mL) to form a two-phase system. After vigorously stirring the reaction mixture for 1 hour, the organic layer was separated and concentrated under reduced pressure. Layerd with acetonitrile (95%) and evaporate slowly to dryness in the air to give crystals of **2** (91% yield). <sup>1</sup>H NMR (600 MHz, CD<sub>2</sub>C1<sub>2</sub>): δ 13.32 (s, 1H), 5.96 (s, 1H), 1.33 (s, 18H) ppm; <sup>13</sup>C NMR (150 MHz, CD<sub>2</sub>C1<sub>2</sub>): 125.5, 98.6, 31.9, 30.9 ppm; IR (Nujol): ν<sub>O-H</sub> 3445 cm<sup>-1</sup>, ν<sub>N-H</sub> 3175, 3138, 3090, 3038 cm<sup>-1</sup>, ν<sub>C=N</sub> 1571 cm<sup>-1</sup>, ν<sub>SO<sub>4</sub><sup>-</sup></sub> 1141, 1089 cm<sup>-1</sup>; Positive ESI-MS: [L+H]<sup>+</sup> 181.32 (100%), [AgL<sub>2</sub>]<sup>+</sup> 467.52 (62%), [Ag<sub>2</sub>L<sub>4</sub>(SO<sub>4</sub>)+H]<sup>+</sup> 1033.04 (10%), [Ag<sub>2</sub>L<sub>5</sub>(SO<sub>4</sub>)+H]<sup>+</sup> 1213.04 (9%), [Ag<sub>3</sub>L<sub>6</sub>(SO<sub>4</sub>)]<sup>+</sup> 1500.92 (69%). Anal. Calcd for C<sub>55</sub>H<sub>102</sub>N<sub>10</sub>Ag<sub>2</sub>O<sub>5</sub>S: C 53.65, H 8.35, N 11.38 %. Found: C, 53.80; H, 8.34; N, 11.48 %.

#### 4 Synthesis of [Ag<sub>2</sub>(L<sup>3</sup>)<sub>6</sub>(SO<sub>4</sub>)] (3)

Method 1. Ag<sub>2</sub>SO<sub>4</sub> (0.146 g, 0.468 mmol) was dissolved in R.O. water (50 mL). To this solution was added dropwisely a solution of L<sup>3</sup> (0.627 g, 2.85 mmol) in acetone (30 mL). After stirring the reaction mixture for another 30 minutes, a white precipitate formed was filtered and washed by R.O. water and ether. Vacuum dry to afford 0.702 g (92%) of a white powder. Method 2. Changing the acetone solvent with dichloromethane to form a two-phase system. After vigorously stirring the reaction mixture for 1 hour, the organic layer was separated and concentrated under reduced pressure. Layerd with ether to give complex **3** (88% yield). <sup>1</sup>H NMR (600 MHz, CD<sub>2</sub>Cl<sub>2</sub>): δ 13.81 (s, 1H), 7.71-7.02 (m, 10H), 6.77 (s, 1H) ppm; <sup>13</sup>C NMR (150 MHz, CD<sub>2</sub>Cl<sub>2</sub>): 149.5, 131.2, 129.4, 128.8, 126.3, 100.9 ppm; IR (Nujol): ν<sub>N-H</sub> 3190, 3138, 3112, 3097 cm<sup>-1</sup>, ν<sub>C=N</sub> 1571 cm<sup>-1</sup>, ν<sub>SO<sub>4</sub><sup>-</sup></sub> 1124, 1110, 1075, 1052 cm<sup>-1</sup>; Positive ESI-MS: [L+H]<sup>+</sup> 221.70 (72%), [AgL<sub>2</sub>]<sup>+</sup> 549.86 (100%), [Ag<sub>3</sub>L<sub>6</sub>(SO<sub>4</sub>)]<sup>+</sup> 1740.38 (10%). Single crystals suitable for X-ray structure determination are grown from CH<sub>2</sub>Cl<sub>2</sub>/Et<sub>2</sub>O. Anal. Calcd for C<sub>90</sub>H<sub>72</sub>N<sub>12</sub>Ag<sub>2</sub>O<sub>4</sub>S: C 66.18, H 4.44, N 10.29 %. Found: C 66.57, H 4.51, N 10.23 %.

#### 5 Synthesis of [Cu<sub>2</sub>(Hpz<sup>Ph,Ph</sup>)<sub>6</sub>(SO<sub>4</sub>)] (4)

A mixture of complex **3** (0.214g, 0.131 mmol) and CuBr (0.0384g, 0.268 mmol) was stirred in 5 mL CH<sub>2</sub>Cl<sub>2</sub> for 30 min under N<sub>2</sub> at room temperature. The reaction was filtered and the filtrate was evaporated under reduced pressure to afford white solid. The solid was washed by diethyl ether and dried *in vacuo*. Single crystals were grown by layering a CH<sub>2</sub>Cl<sub>2</sub> solution with diethyl ether (0.178g, 86% yield). The purity is confirmed by X-ray powder diffraction patterns as shown in S12. Anal. Calcd for [Cu<sub>2</sub>C<sub>90</sub>H<sub>72</sub>N<sub>12</sub>SO<sub>4</sub>]. (CH<sub>2</sub>Cl<sub>2</sub>)<sub>0.5</sub>: N, 10.59; C, 68.48; H, 4.64. Found: N, 10.64; C, 68.35; H, 4.32 %. <sup>1</sup>H NMR (600 MHz, CD<sub>2</sub>Cl<sub>2</sub>): δ 14.56 (s, 1H), 7.74 (d, *J* = 7.4 Hz, 4H), 7.13 (t, *J* = 7.3 Hz, 2H), 7.00 (dd, *J* = 7.4, 7.3 Hz, 4H), 6.79 (s, 1H) ppm; <sup>13</sup>C NMR (150 MHz, CD<sub>2</sub>Cl<sub>2</sub>): 148.9, 130.9, 129.1, 128.7, 126.5, 101.0 ppm; IR (Nujol): ν<sub>N-H</sub> 3139, 3090 cm<sup>-1</sup>, ν<sub>C=N</sub> 1572 cm<sup>-1</sup>, ν<sub>SO<sub>4</sub><sup>-</sup></sub> 1125, 1109, 1074, 1052 cm<sup>-1</sup>; Positive ESI-MS: [L+H]<sup>+</sup> 221.47 (100%), [CuL<sub>2</sub>]<sup>+</sup> 503.31 (74%).

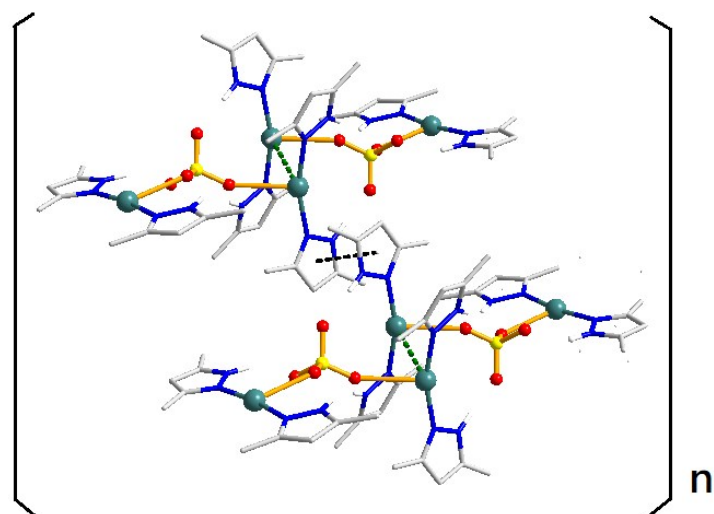

6 Figure S2. The 1-D polymeric array of complex **1**, which is mainly composed of alternative Ag...Ag and  $\pi$ ... $\pi$  interactions.

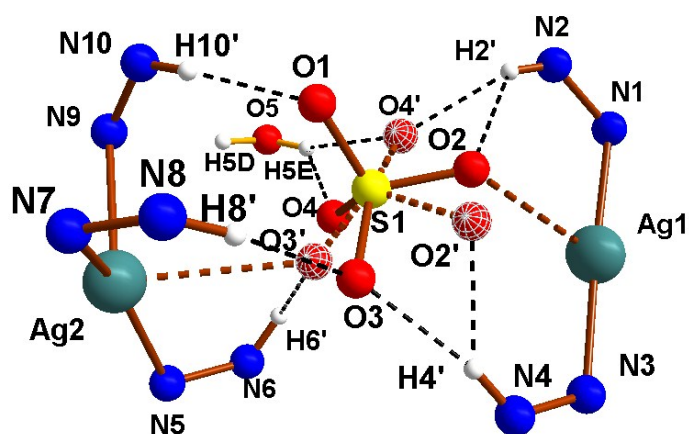

7. Figure S3. The hydrogen bonds and dative bonds around disordered sulfate for complex **2**: H2'...O2 2.04(1), H2'...O4' 1.89(1), H4'...O2' 1.94(1), H4'...O3 1.99 (1), H5E...O4 1.97(1), H5E...O4' 2.24(1), H6'...O3' 2.03(1), H8'...O3 2.09(1), H10'...O1 1.92 (1). Ag1...O2 2.75(2), Ag1...O2 2.56 (1).

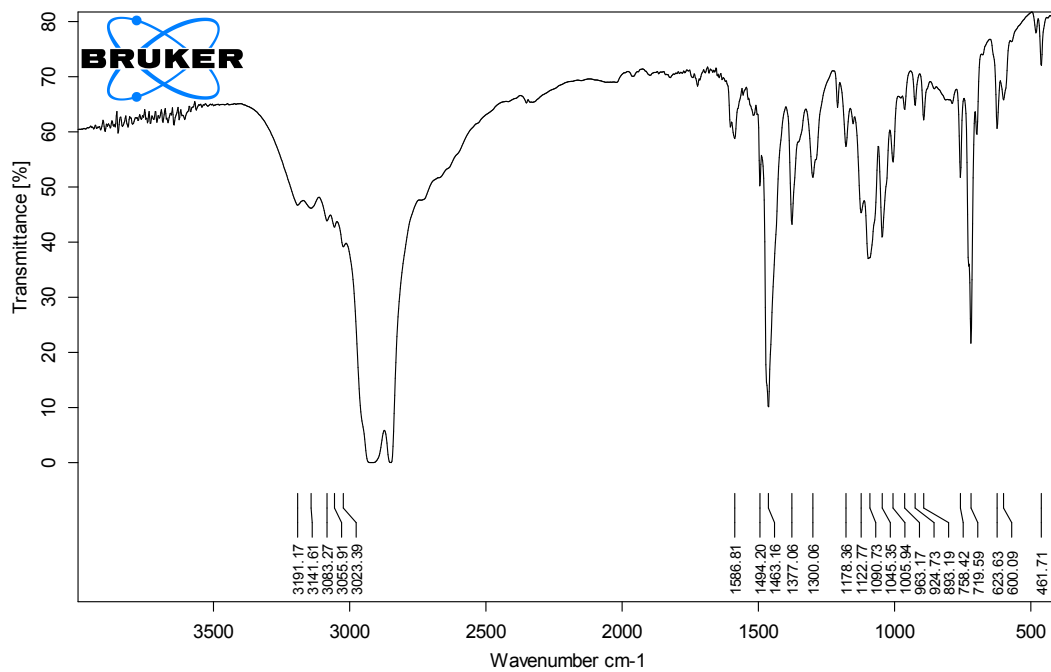

8 Figure S4 IR spectrum of complex 1

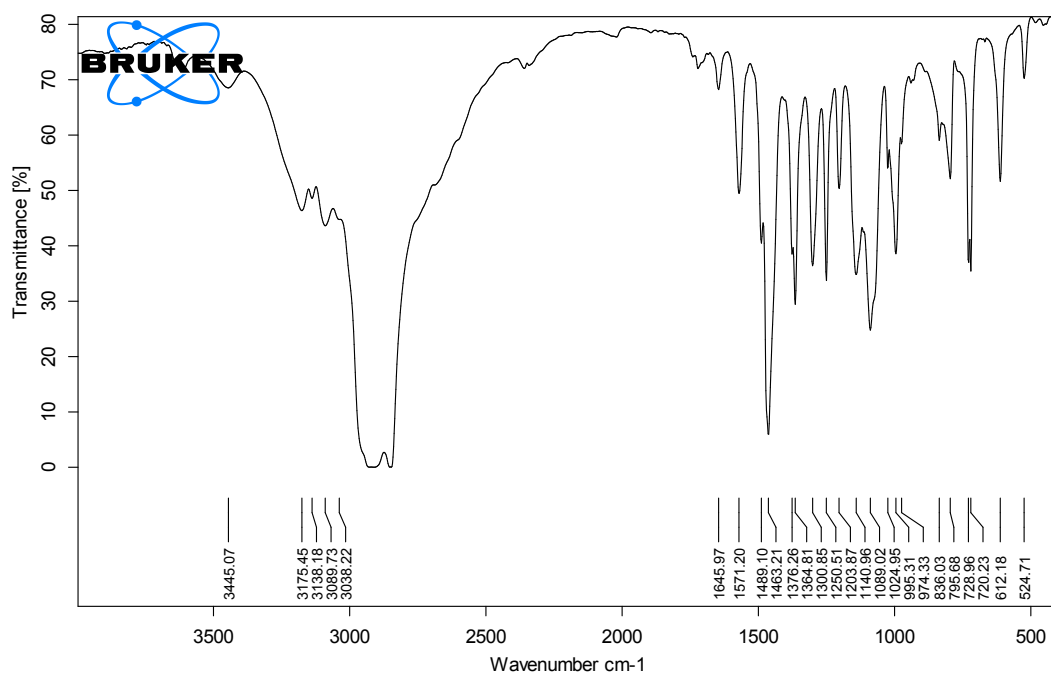

9 Figure S5 IR spectrum of complex 2

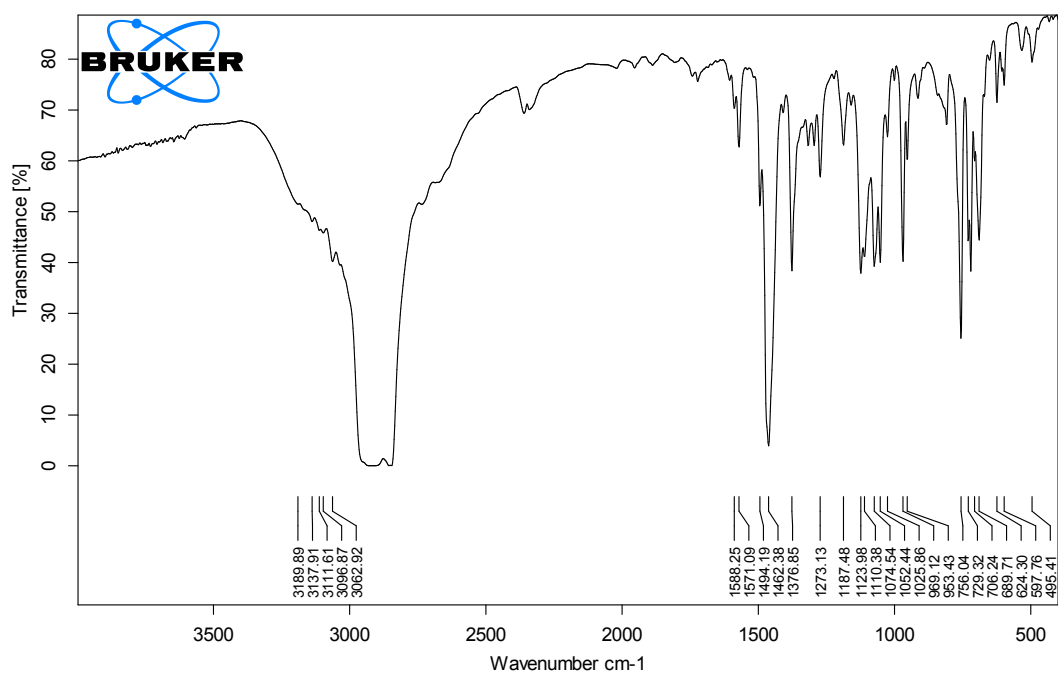

10 Figure S6 IR spectrum of complex 3

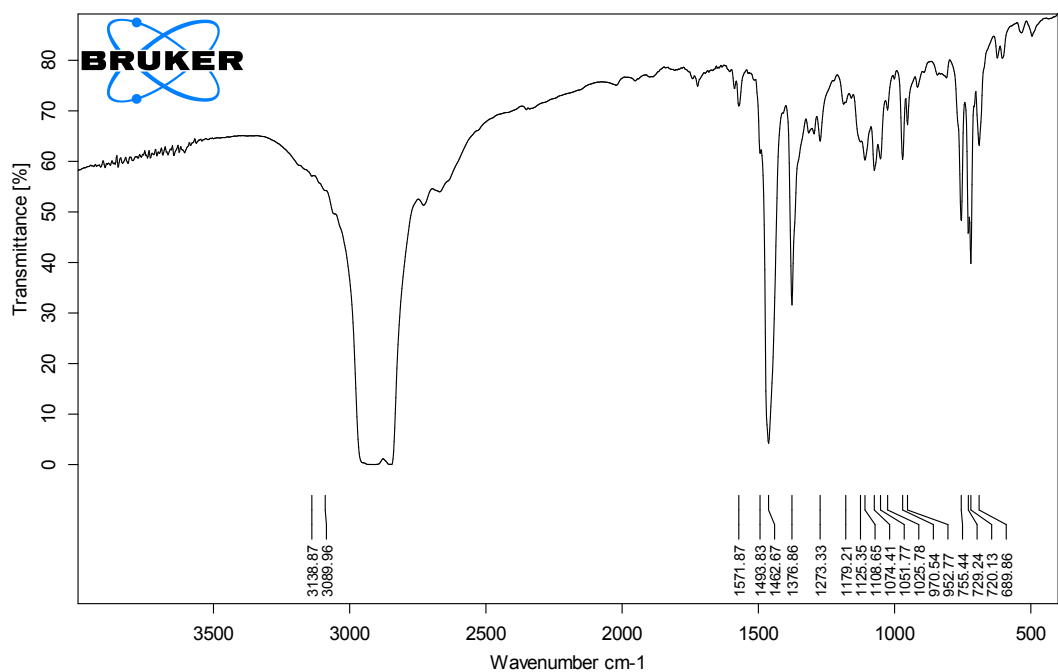

11 Figure S7 IR spectrum of complex 4



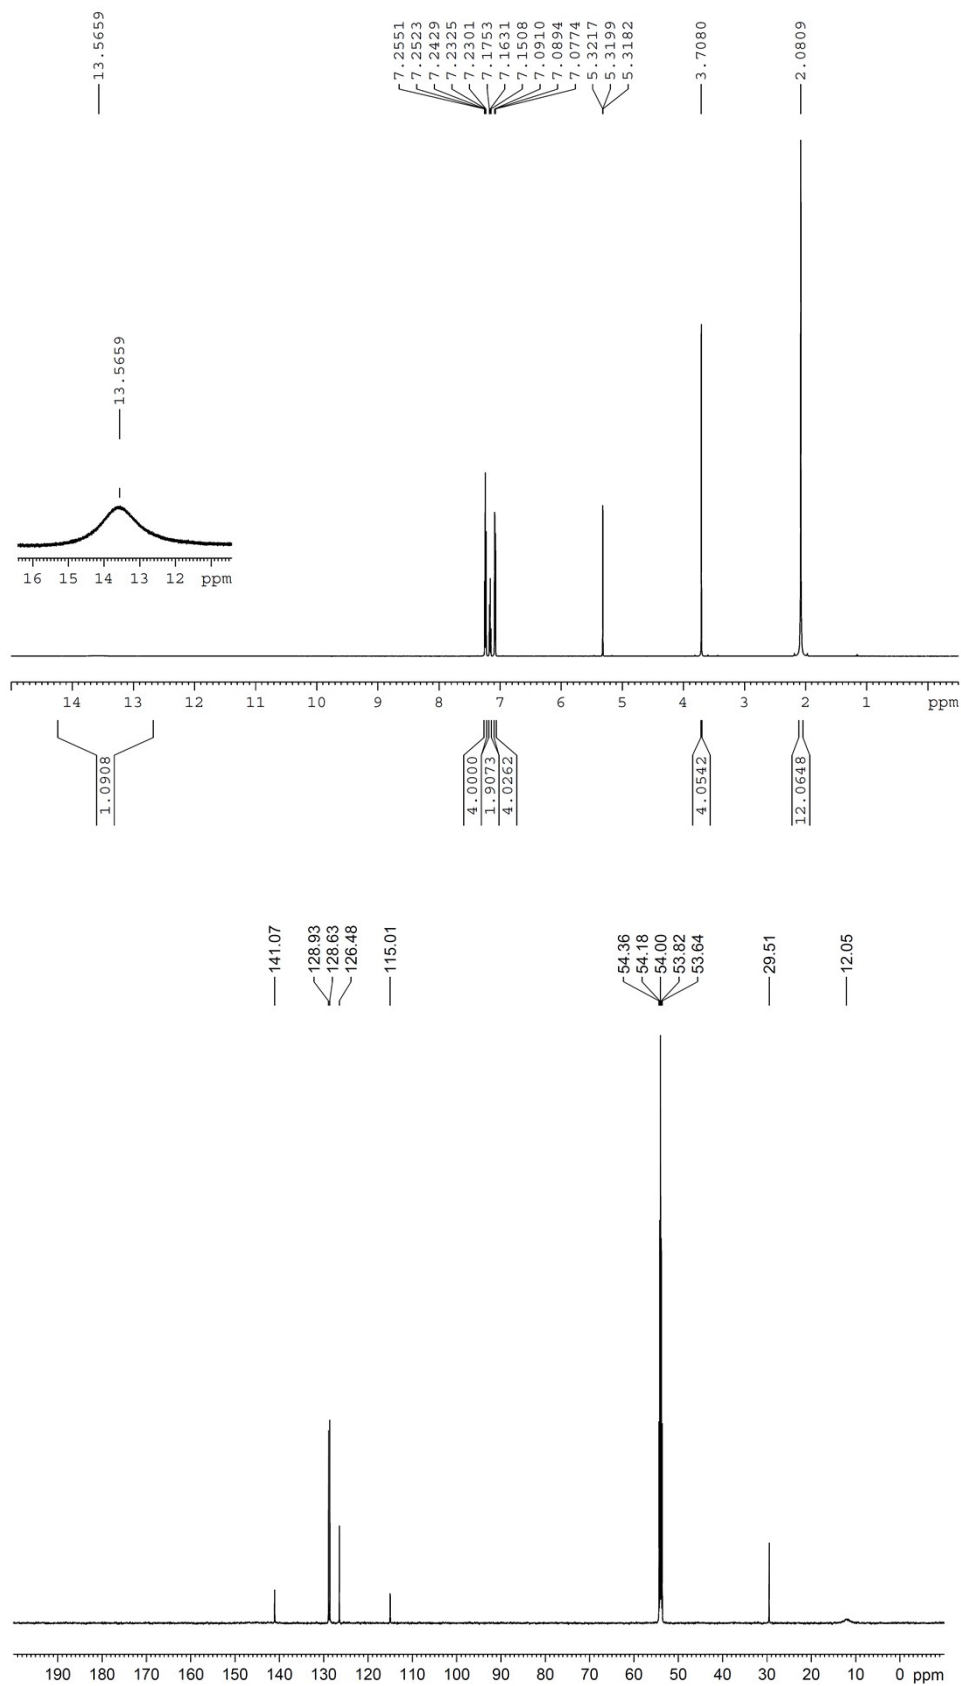

12 Figure S8  $^1\text{H}$  &  $^{13}\text{C}$  NMR spectra of complex 1

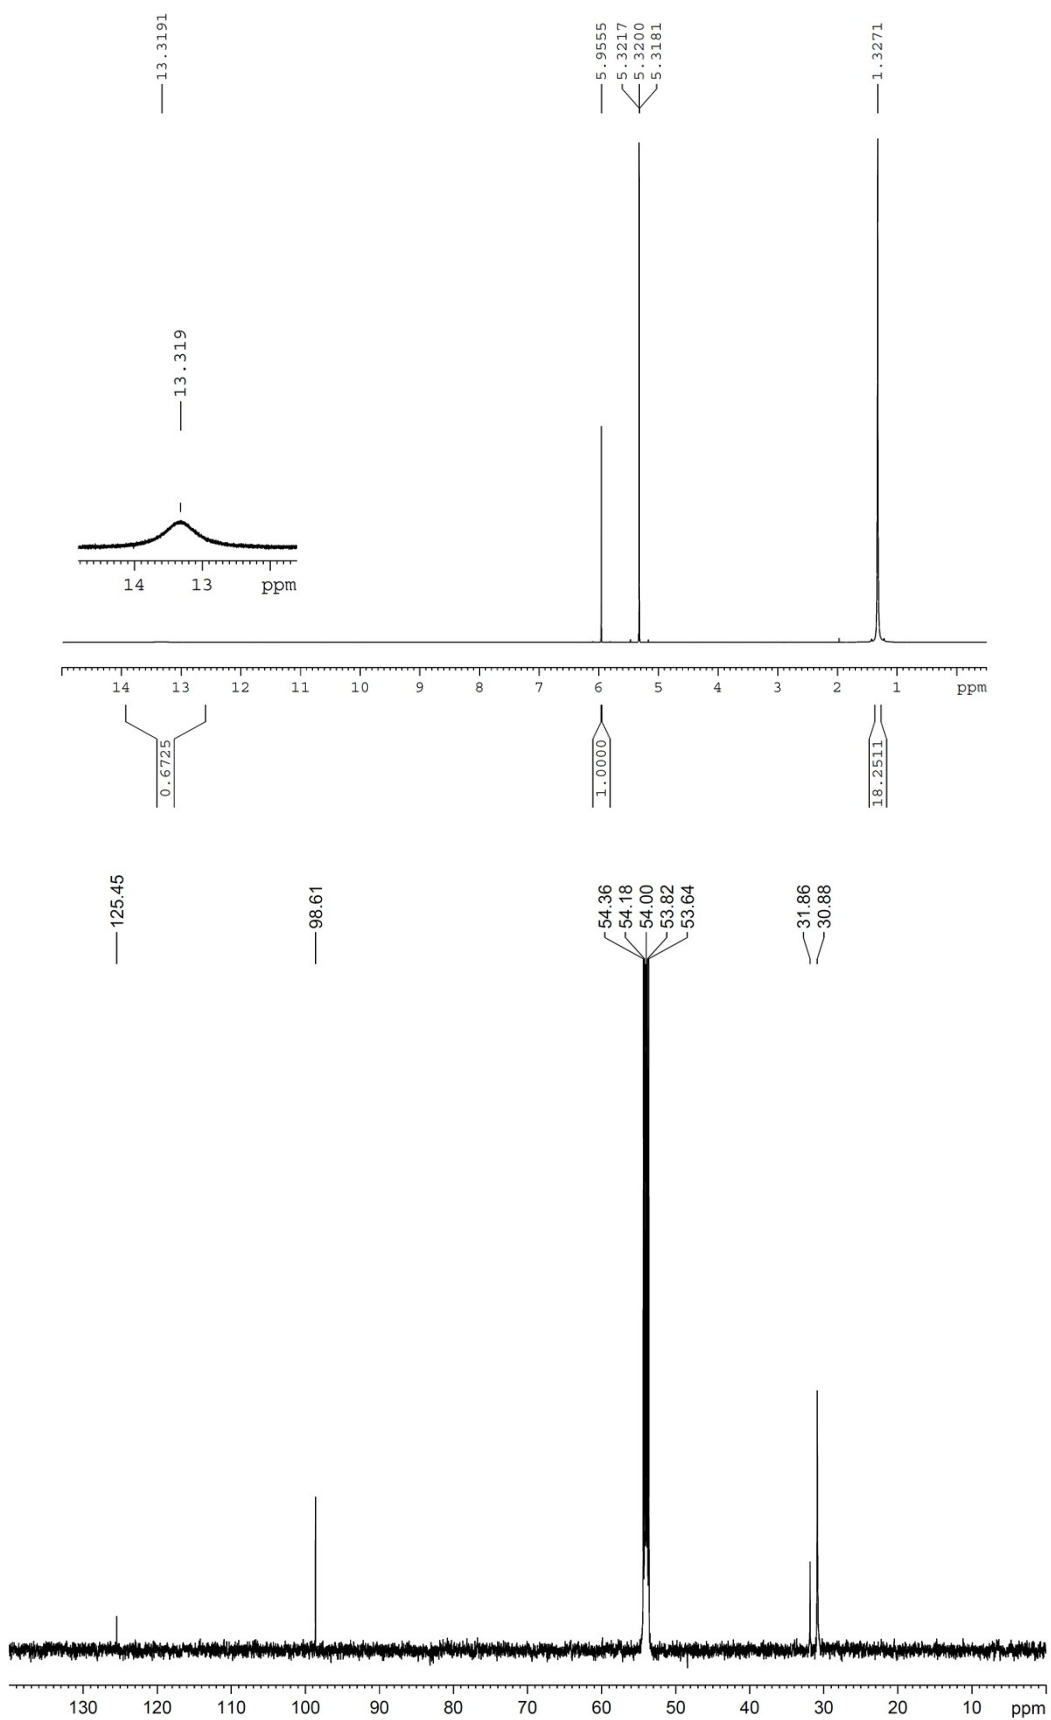

13 Figure S9  $^1\text{H}$  &  $^{13}\text{C}$  NMR spectra of complex 2

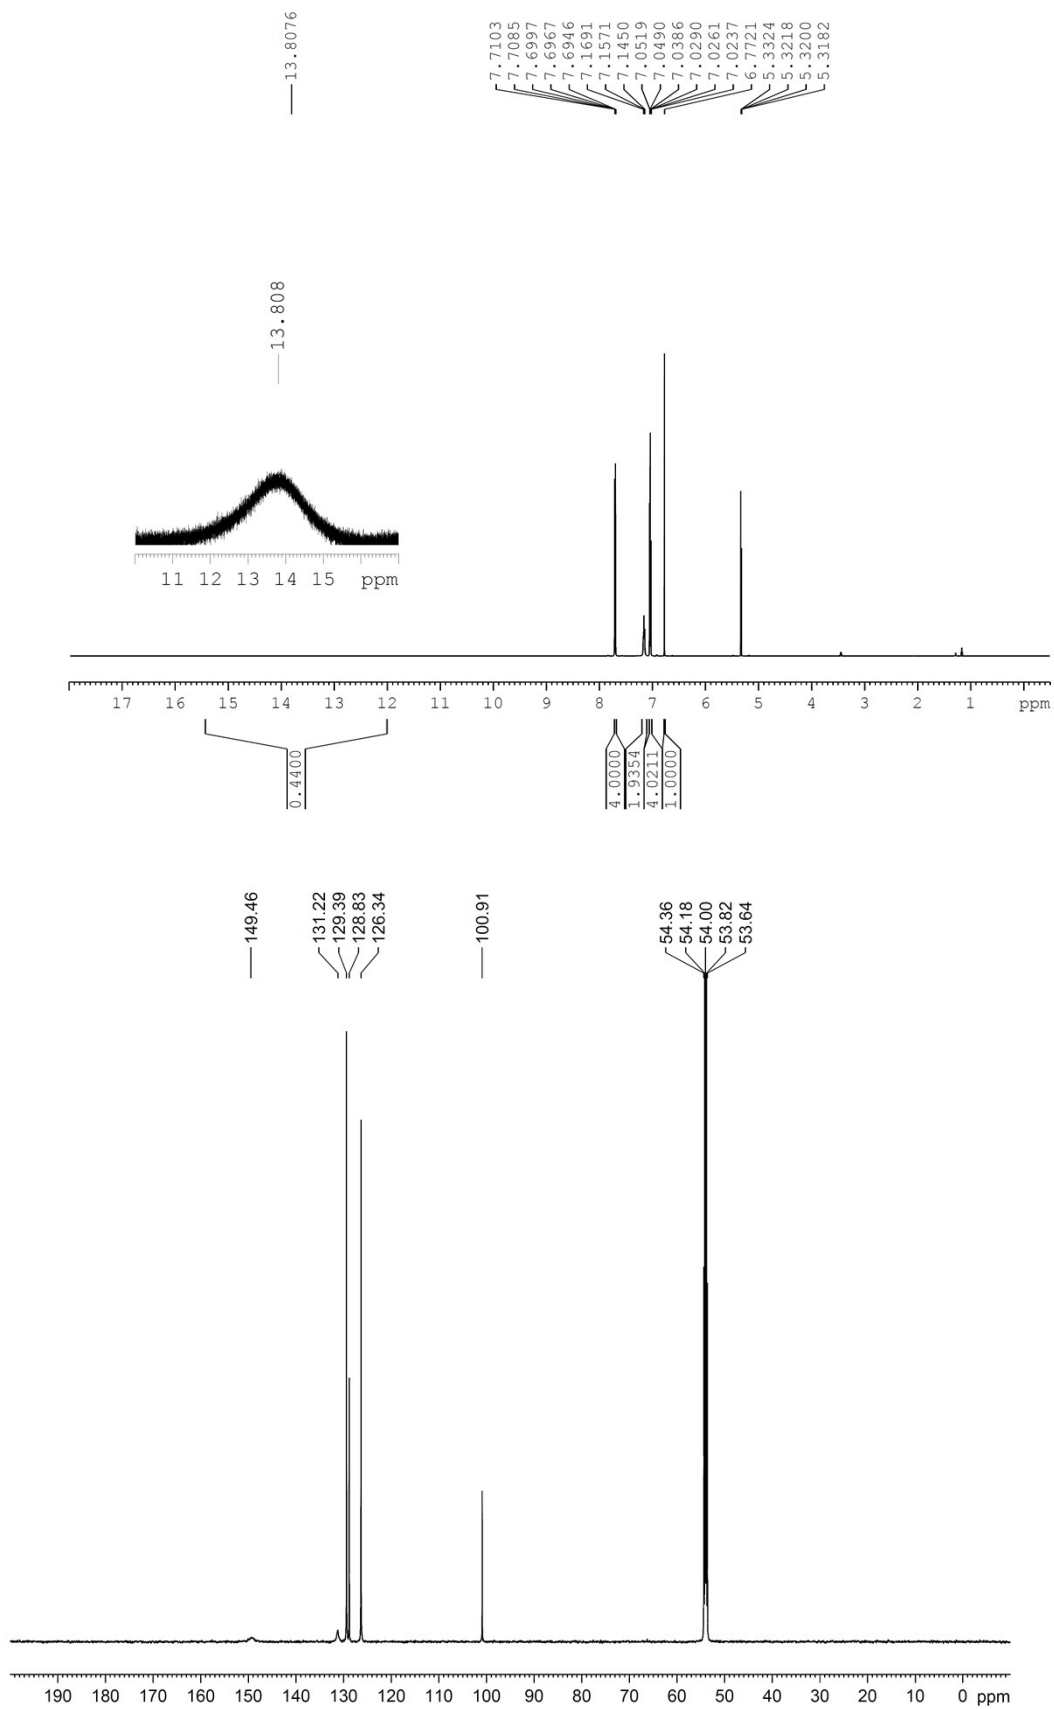

14 Figure S10  $^1\text{H}$  &  $^{13}\text{C}$  NMR spectra of complex 3

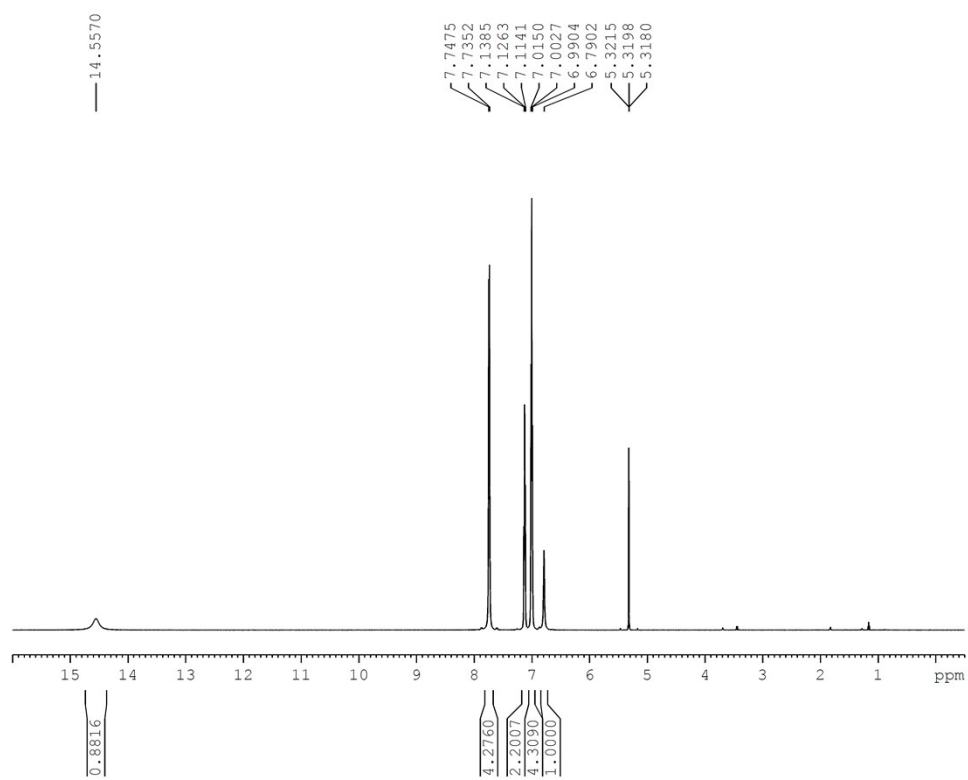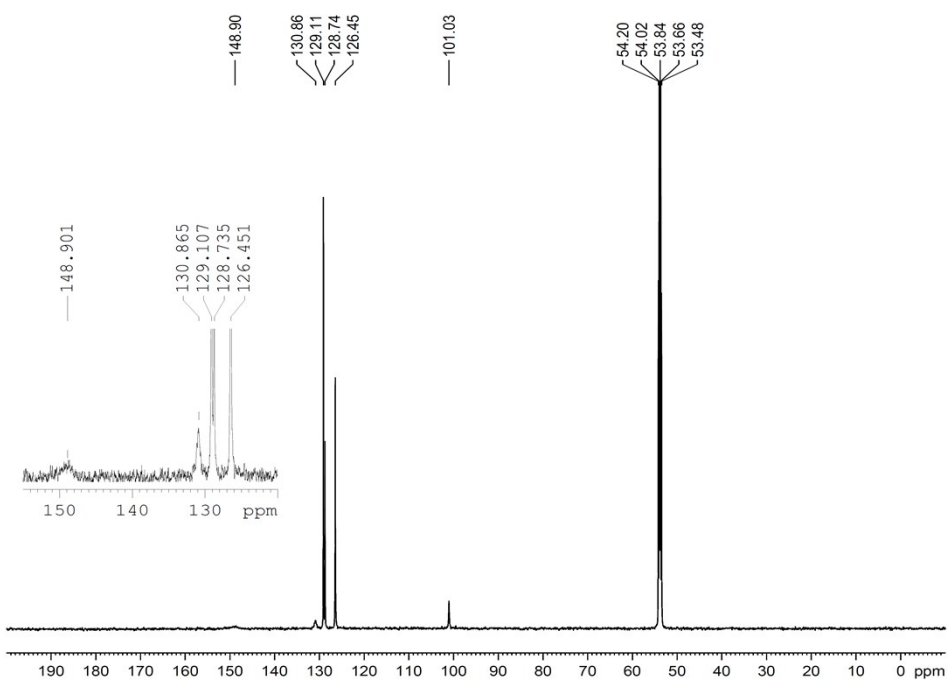

15 Figure S11  $^1\text{H}$  &  $^{13}\text{C}$  NMR spectra of complex 4

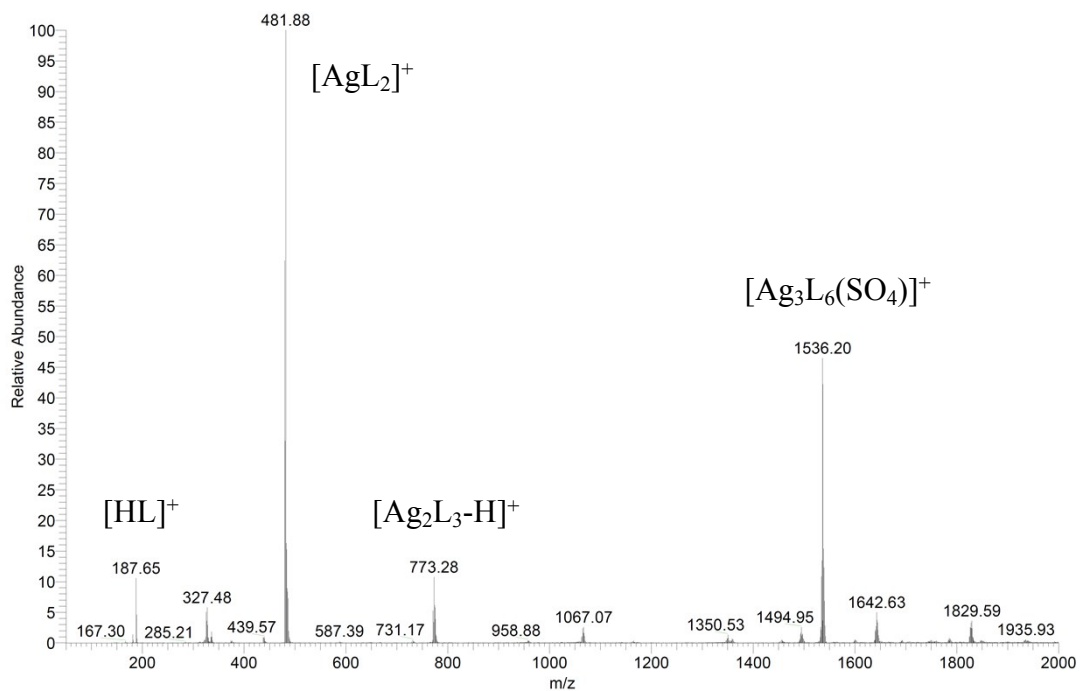

16 Figure S12. ESI-MS of complex 1.

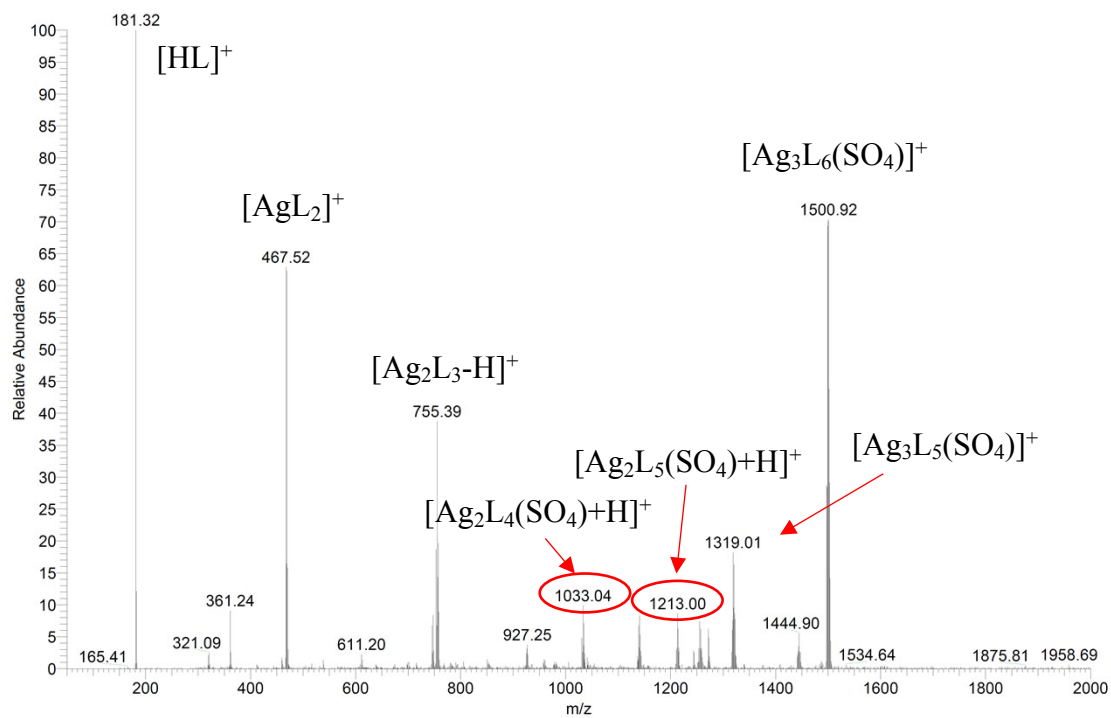

17 Figure S13. ESI-MS of complex 2.

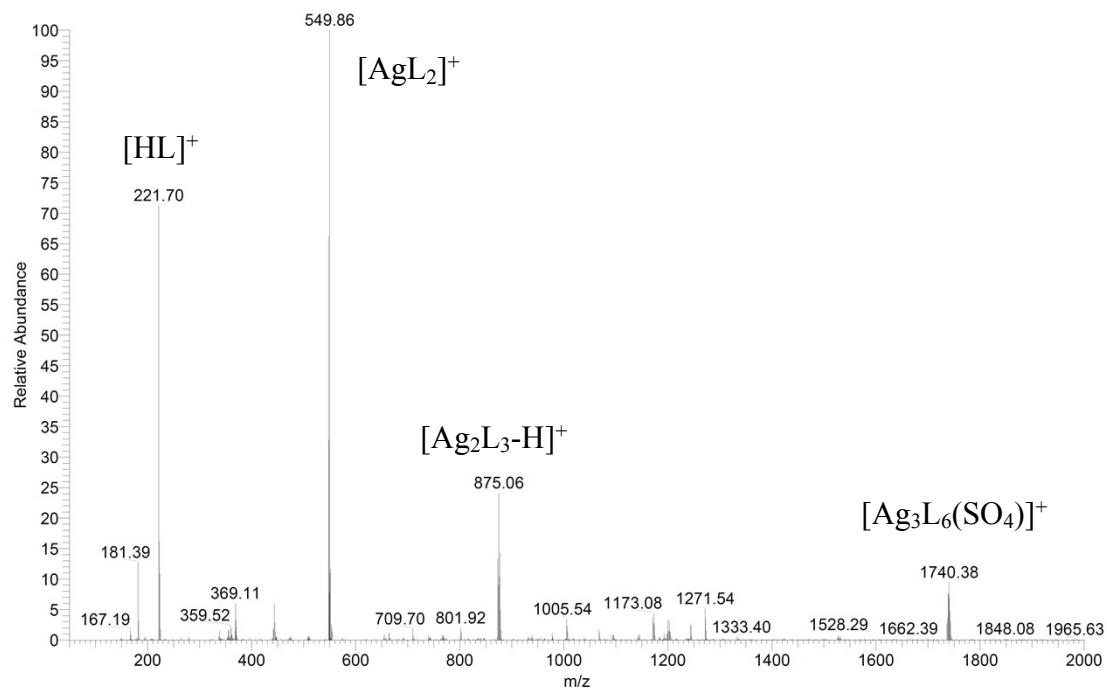

18 Figure S14. ESI-MS of complex 3.

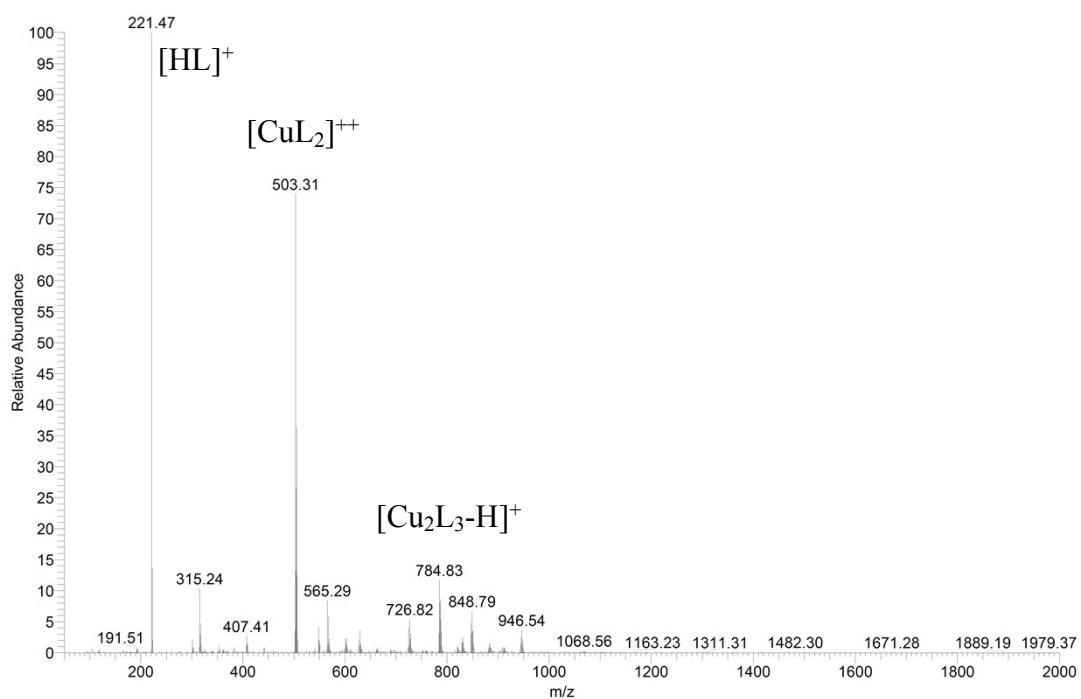

19 Figure S15. ESI-MS of complex 4.

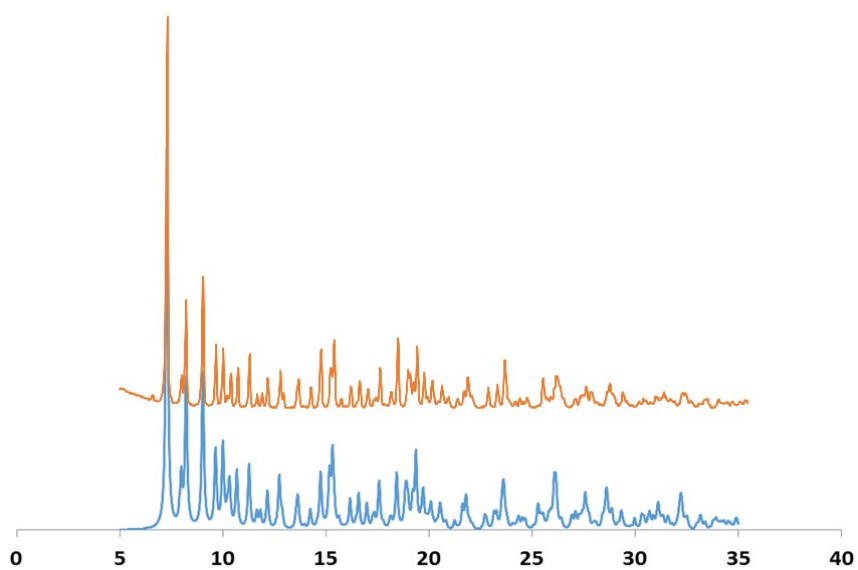

**20** Figure S16. PXRD of complex **2**. Experimental (up) and simulated (down) results

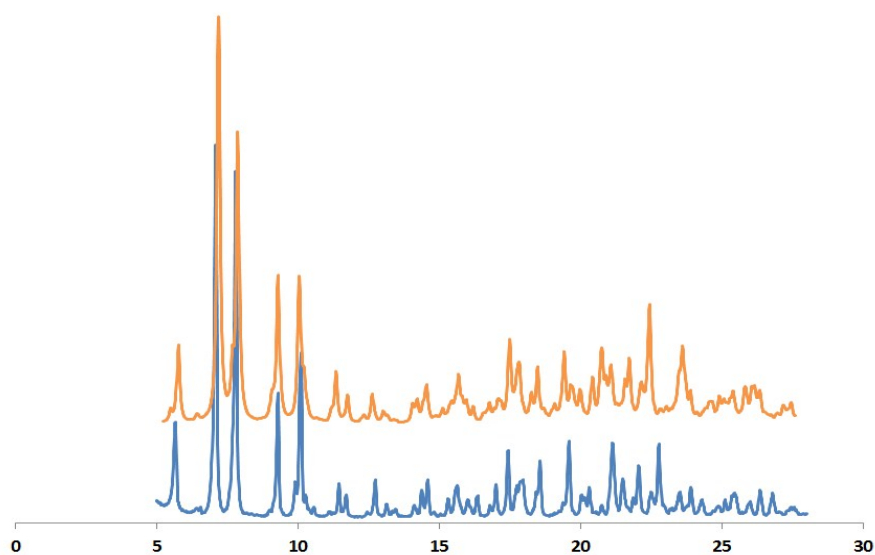

**21** Figure S17. PXRD of complex **3**. Experimental (up) and simulated (down) results

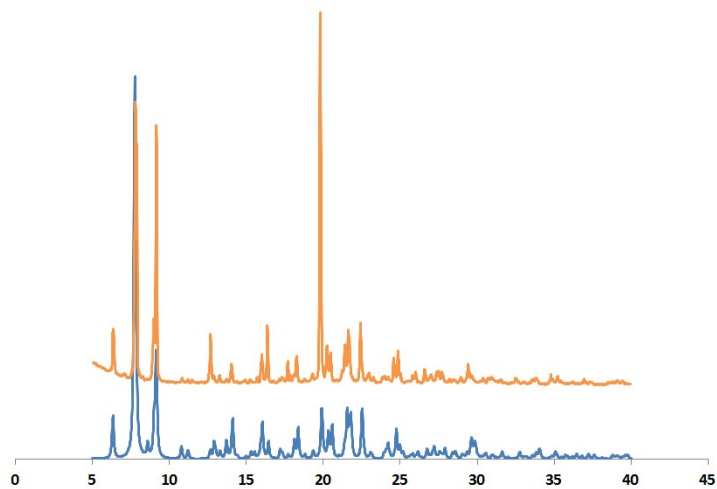

**22** Figure S18. PXR D of complex **4**. Experimental (up) and simulated (down) results.

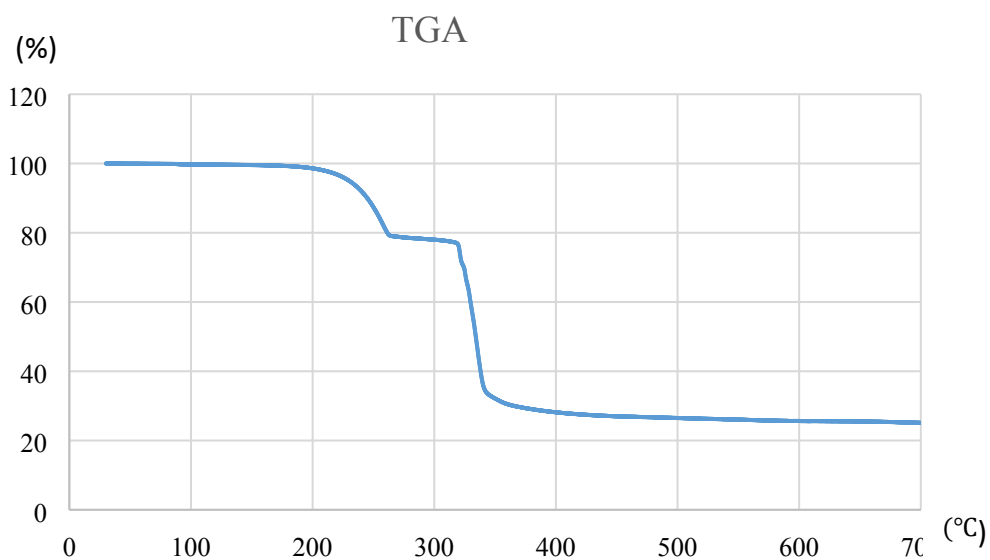

**23** Figure S19. TGA of complex **1**.



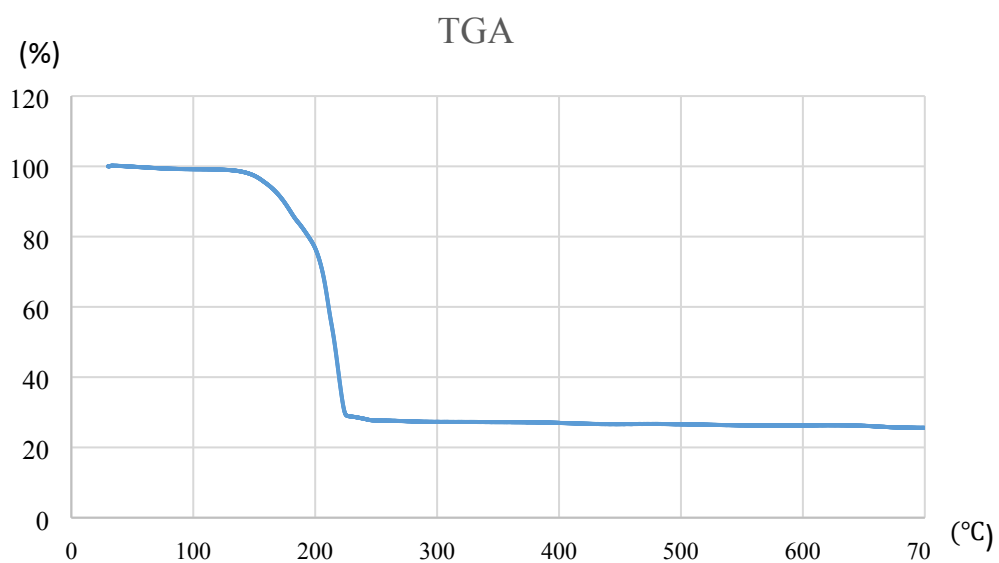

**24** Figure S20. TGA of complex 2.

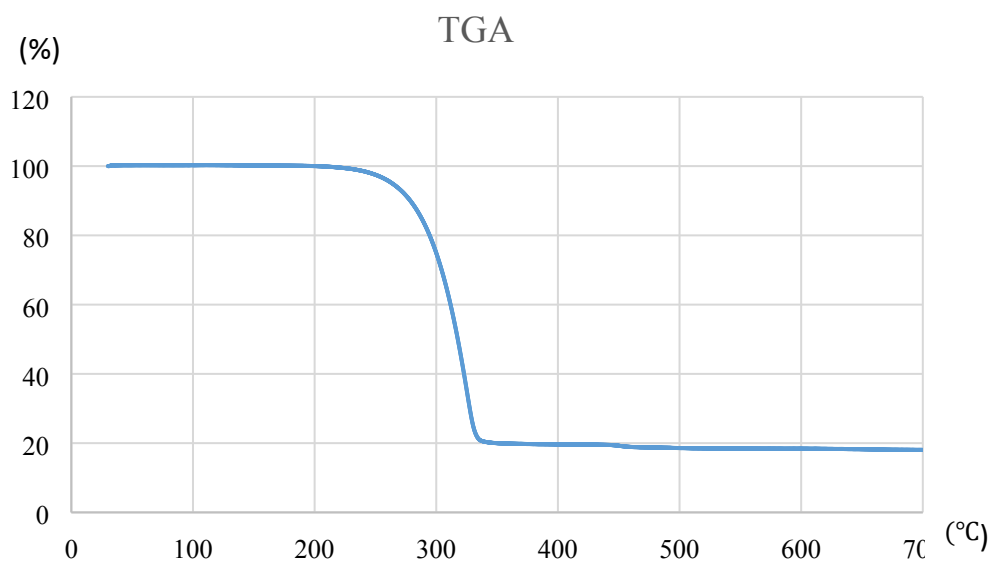

**25** Figure S21. TGA of complex 3.

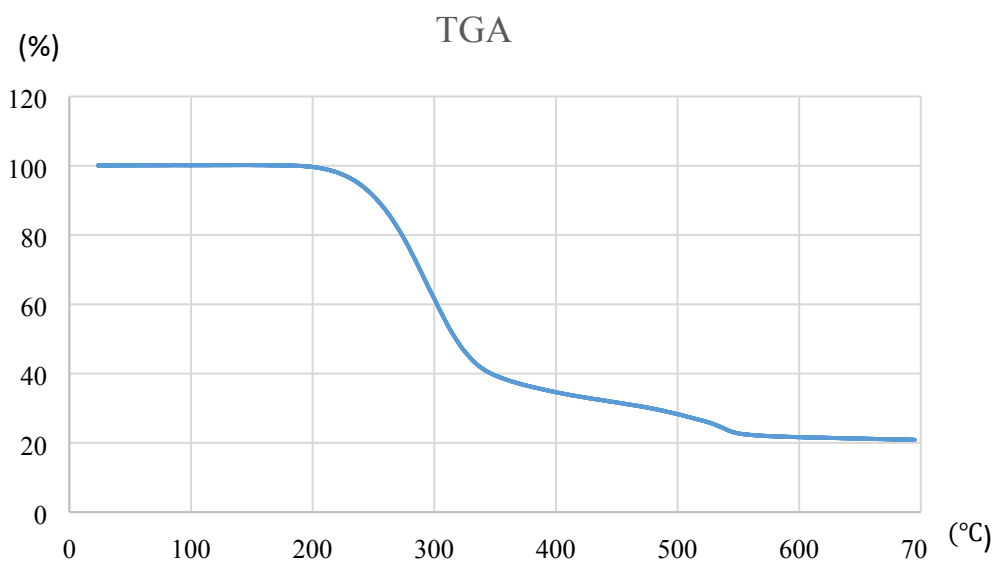

**26** Figure S22. TGA of complex 4.
